# Supplementary material for: Multiyear Links between Water Chemistry, Algal Chlorophyll, Drought-Flood Regime, and Nutrient Enrichment in a Morphologically Complex Reservoir
Source: PubMed Central journal article supplement (PMC7246998; doi:10.3390/ijerph17093139), 2020-04-30
Supplement: ijerph-17-03139-s001.pdf [file ijerph-17-03139-s001.pdf]

Supplementary Material

**Table S1.** Detailed location of study sites in the Soyang reservoir.

| <b>Site</b>  | <b>Address</b>                                     | <b>Coordinates</b>           |
|--------------|----------------------------------------------------|------------------------------|
| Soyang Dam 1 | Cheonjeon-ri, Sinbuk-eup, Chuncheon-si, Gangwon-do | 127°49'16.05"E 37°56'40.92"N |
| Soyang Dam 2 | Ohang-ri, Buksan-myeon, Chuncheon-si, Gangwon-do   | 127°54'38.68"E 37°57'42.95"N |
| Soyang Dam 3 | Seokhyeon-ri, Yanggu-eup, Yanggu-gun, Gangwon-do   | 127°57'45.88"E 38°02'05.45"N |
| Soyang Dam 4 | Bupyeong-ri, Nam-myeon, Inje-gun, Gangwon-do       | 128°05'58.51"E 38°00'22.73"N |
| Soyang Dam 5 | Sangsunae-ri, Nam-myeon, Inje-gun, Gangwon-do      | 128°03'33.25"E 37°59'28.52"N |
